# Supplementary material
Source: publisher figshare collection journal article supplement (https://sage.figshare.com/ndownloader/files/12453932)
Supplement: Supplementary file 1 [file 12453932]

(a) Forearm perturbation

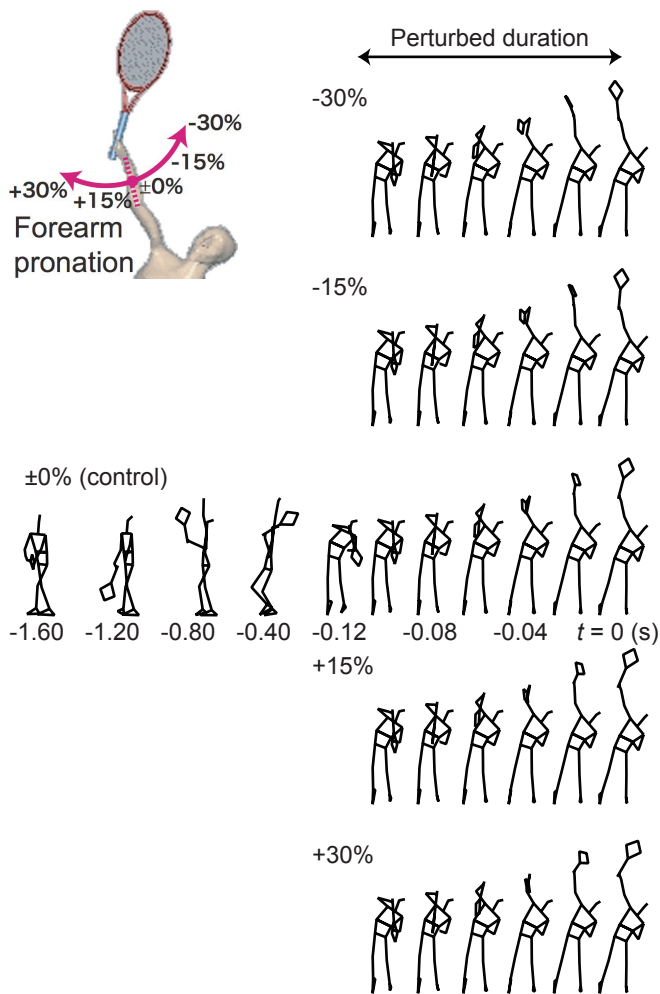

(b) Elbow perturbation

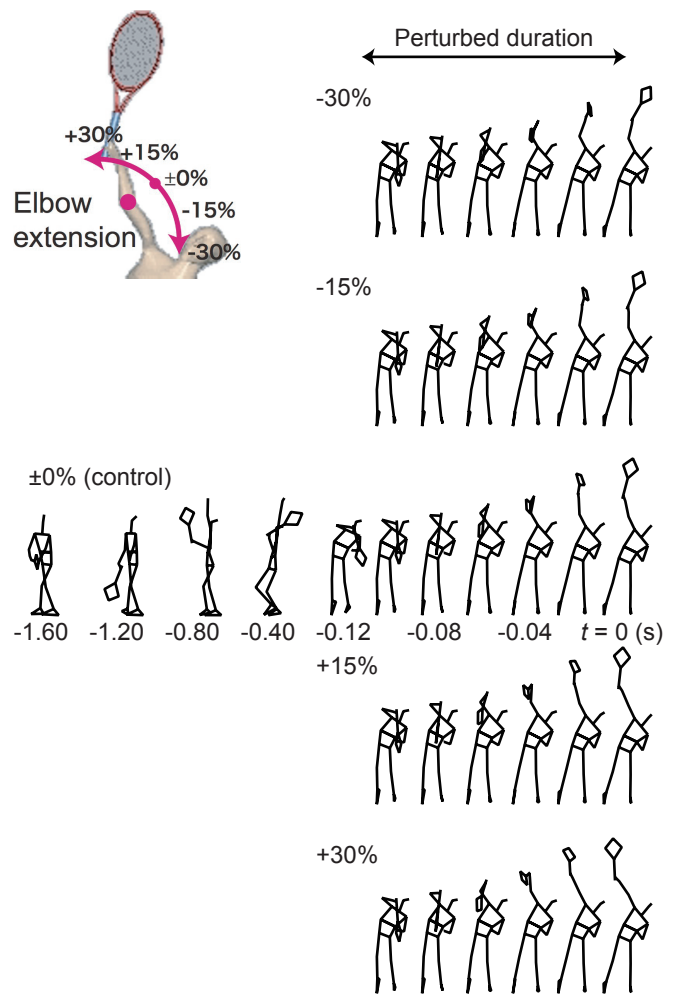

Figure S1. Stick-figure schematic of motion patterns created through forearm perturbation (a) and elbow perturbation (b). Perturbed duration was set from  $t = -0.12$  (s) to 0 (from the initiation of forward swing to the racket-ball contact). Note that the stimulus animations were rendered by using a polygon human character (see Figure 1).
